# Supplementary material
Source: MDPI journal article supplement (https://www.mdpi.com/2073-4441/10/4/418)
Supplement: s1 [file s1]

# Removal of Sb(III) and Sb(V) by Ferric Chloride Coagulation: Implications of Fe solubility

## Supplementary Materials

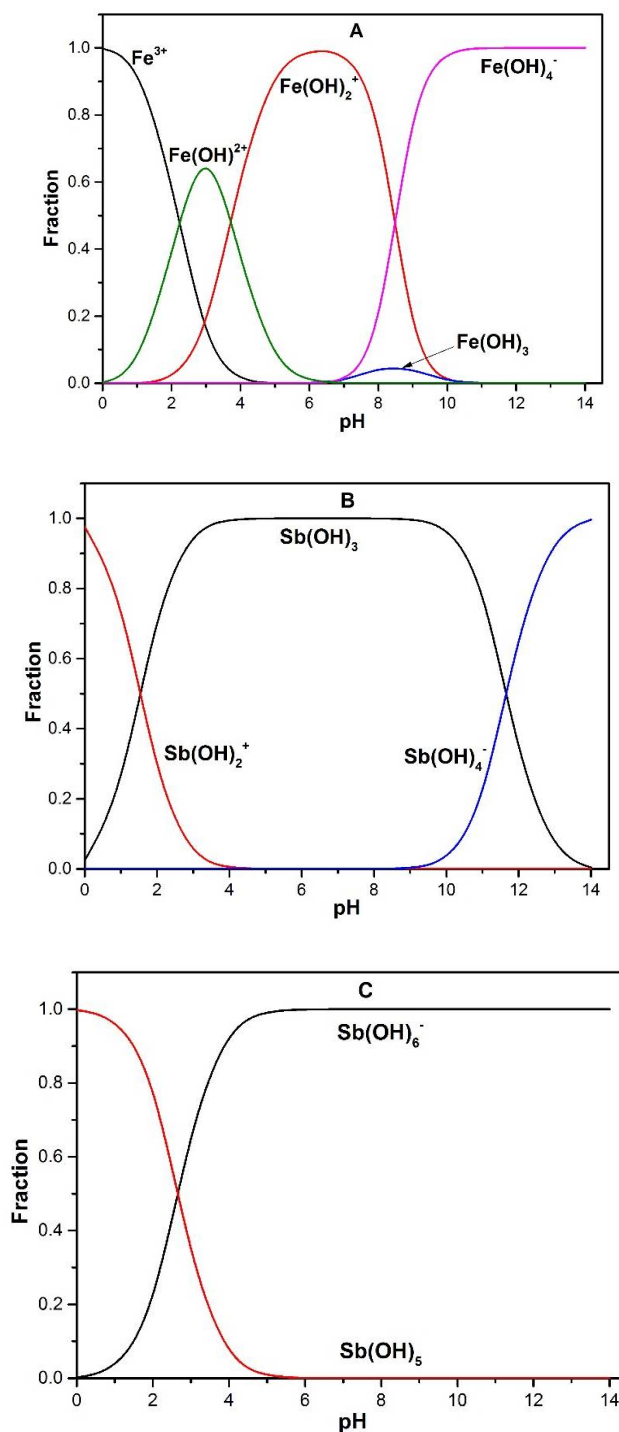

**Figure S1.** Speciation of (A) Fe(III); (B) Sb(III); (C) Sb(V) in water at 25°C. Diagrams derived by Visual MINTEQ 3.1 (<http://vminteq.lwr.kth.se>).

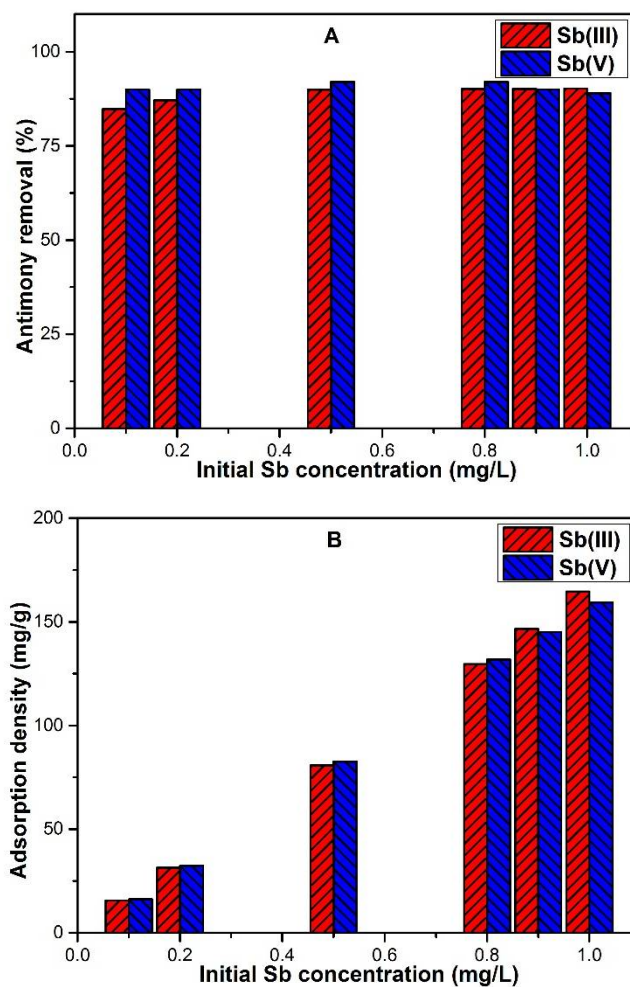

**Figure S2.** Across various initial Sb concentrations 0.1 to 1 mg/L, neutral pH, 0.1 mM FC dose and temperature T 25°C, **(A)** antimony removal (%); **(B)** adsorption densities (mg/g).
